# Supplementary material for: Glycolysis Aids in Human Lens Epithelial Cells’ Adaptation to Hypoxia
Source: MDPI journal article supplement (doi:10.3390/antiox12061304), 2023-06-19
Supplement: s1 [file s1]

## Supplementary Data

**Table S1. The sequence of qRT-PCR primers**

| F: Forward Primer<br>R: Reverse Primer | Sequence (5' -> 3')     | GenBank<br>Accession |
|----------------------------------------|-------------------------|----------------------|
| human-GRP94-F                          | CCAGTTTGGTGTCTGGTTTCTAT | NM_003299            |
| human-GRP94-R                          | CTGGGTATCGTTGTTGTGTTTG  | NM_003299            |
| human-GRP78-F                          | CATCACGCCGTCCTATGTCG    | NM_005347            |
| human-GRP78-R                          | CGTCAAAGACCGTGTCTCG     | NM_005347            |
| human-CHOP-F                           | GGAAACAGAGTGGTCATTCCC   | NM_001195055         |
| human-CHOP-R                           | CTGCTTGAGCCGTTTCATTCTC  | NM_001195055         |
| human-XBP1-F                           | CCCTCCAGAACATCTCCCAT    | NM_001079539         |
| human-XBP1-R                           | ACATGACTGGGTCCAAGTTGT   | NM_001079539         |
| human-NRF2-F                           | TCCAGTCAGAAACCAGTGGAT   | NM_001145412         |
| human-NRF2-R                           | GAATGTCTGCGCCAAAAGCTG   | NM_001145412         |
| human-NOX4-F                           | CAGATGTTGGGGCTAGGATTG   | NM_001143836         |
| human-NOX4-R                           | GAGTGTTGCGCACATGGGTA    | NM_001143836         |
| human-CAT-F                            | TGGGATCTCGTTGGAAATAACAC | NM_001752            |
| human-CAT-R                            | TCAGGACGTAGGCTCCAGAAG   | NM_001752            |
| human-SOD1-F                           | GGTGGGCCAAAGGATGAAGAG   | NM_000454            |
| human-SOD1-R                           | CCACAAGCCAAACGACTTCC    | NM_000454            |
| human-BCL2-F                           | GGTGGGGTCATGTGTGTGG     | NM_000657            |
| human-BCL2-R                           | CGGTTACAGGTAATCAGTCATCC | NM_000657            |
| human-BAX-F                            | CCCGAGAGGTCTTTTCCGAG    | NM_138763            |
| human-BAX-R                            | CCAGCCCATGATGGTTCTGAT   | NM_138763            |
| human-CYCS-F                           | CTTTGGGCGGAAGACAGGTC    | NM_018947            |
| human-CYCS-R                           | TTATTGGCGGCTGTGTAAGAG   | NM_018947            |
| human-CASP1-F                          | TTCCGCAAGGTTTCGATTTCA   | NM_033294            |
| human-CASP1-R                          | GGCATCTGCGCTCTACCATC    | NM_033294            |
| human-CASP3-F                          | CATGGAAGCGAATCAATGGACT  | NM_004346            |
| human-CASP3-R                          | CTGTACCAGACCGAGATGTCA   | NM_004346            |
| human-CASP4-F                          | CAAGAGAAGCAACGTATGGCA   | NM_033306            |
| human-CASP4-R                          | AGGCAGATGGTCAAACCTCTGTA | NM_033306            |
| human-CASP7-F                          | AGTGACAGGTATGGGCGTTC    | NM_033339            |
| human-CASP7-R                          | CGGCATTTGTATGGTCCTCTT   | NM_033339            |
| human-CASP8-F                          | GGGTCATCCTGGGAGAAGGA    | NM_001137667         |
| human-CASP8-R                          | ACAACCTCTCCCTTTGCTG     | NM_001137667         |
| human-CASP9-F                          | CTCAGACCAGAGATTCGCAAAC  | NM_032996            |
| human-CASP9-R                          | GCATTTCCCCTCAAACCTCTCAA | NM_032996            |
| human-Bactin-F                         | CATGTACGTTGCTATCCAGGC   | NM_001101            |
| human-Bactin-R                         | CTCCTTAATGTCACGCACGAT   | NM_001101            |
